# Supplementary material for: A novel fluorescent sensor based on sulfur and nitrogen co-doped carbon dots with excellent stability for selective detection of doxycycline in raw milk
Source: Royal Society of Chemistry journal article supplement (doi:10.1039/c7ra01074e), 2017-01-01
Supplement: c7ra01074e1.pdf [file c7ra01074e1.pdf]

# **A novel fluorescent sensor based on sulfur and nitrogen co-doped carbon dots with excellent stability for selective detection of doxycycline in raw milk**

Jinping Song <sup>a,b</sup>, Jing Li <sup>c</sup>, Ziyang Guo <sup>b</sup>, Wen Liu <sup>b</sup>, Qi Ma <sup>\*b</sup>, Feng Feng <sup>\*a,b</sup> and Chuan Dong <sup>\*a</sup>

<sup>a</sup>. Institute of Environmental Science, Shanxi University, Taiyuan, 030006, China

<sup>b</sup>. College of Chemistry and Environmental Engineering, and Institute of Applied Chemistry, Shanxi Datong University, Datong, Shanxi, 037009, China

<sup>c</sup>. School of Chemistry and Material Science, Shanxi Normal University, Linfen, 041001, China

Table S1 Quantum yield of S, N-CDs

| Sample          | Integrated emission<br>Intensity (I) | Abs. at 350 nm<br>(A) | Refractive index<br>of solvent ( $\eta$ ) | Quantum Yield<br>( $\Phi$ /%) |
|-----------------|--------------------------------------|-----------------------|-------------------------------------------|-------------------------------|
| Quinine sulfate | 43296                                | 0.0548                | 1.33                                      | 54.00                         |
| S,N-CDs         | 3982                                 | 0.0354                | 1.33                                      | 7.69                          |

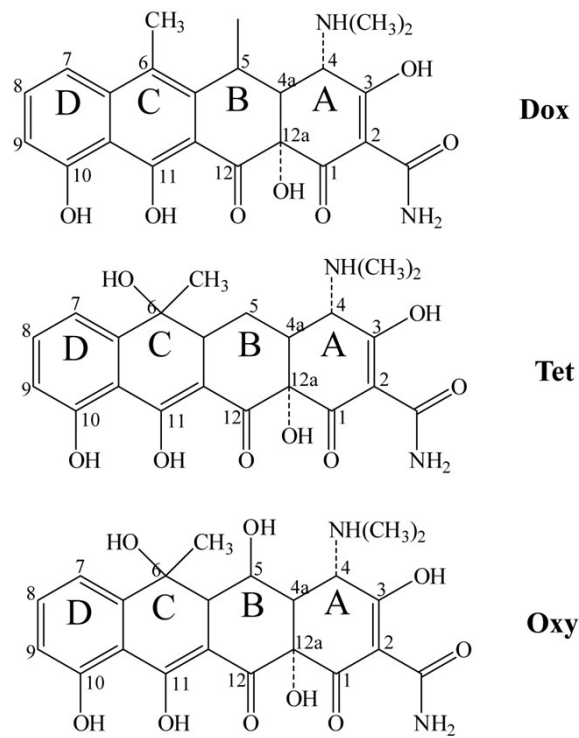

Figure S1 The Chemical structure of Dox, Tet and Oxy.
